# Supplementary material for: Associations between Breastfeeding Duration and Obesity Phenotypes and the Offsetting Effect of a Healthy Lifestyle
Source: MDPI journal article supplement (doi:10.3390/nu14101999), 2022-05-10
Supplement: s1 [file s1]

**Table S1.** Associations between breastfeeding duration and obesity phenotypes.

| Obesity phenotypes <sup>a</sup> | Breastfeeding duration (months) | No. of cases | OR (95% CI)              |                          |                          |
|---------------------------------|---------------------------------|--------------|--------------------------|--------------------------|--------------------------|
|                                 |                                 |              | Model 1 <sup>b</sup>     | Model 2 <sup>c</sup>     | Model 3 <sup>d</sup>     |
| MUNW                            | 0–5                             | 551          | 1.00 (0.89, 1.12)        | 0.94 (0.83, 1.07)        | 0.96 (0.84, 1.10)        |
|                                 | 6–11                            | 847          | Ref.                     | Ref.                     | Ref.                     |
|                                 | ≥12                             | 844          | <b>1.39 (1.24, 1.57)</b> | <b>1.43 (1.27, 1.62)</b> | <b>1.35 (1.19, 1.52)</b> |
| MHO                             | 0–5                             | 171          | <b>1.46 (1.16, 1.84)</b> | <b>1.38 (1.09, 1.74)</b> | 1.24 (0.97, 1.57)        |
|                                 | 6–11                            | 153          | Ref.                     | Ref.                     | Ref.                     |
|                                 | ≥12                             | 164          | <b>1.50 (1.19, 1.89)</b> | <b>1.55 (1.23, 1.96)</b> | <b>1.61 (1.27, 2.05)</b> |
| MUO                             | 0–5                             | 179          | 0.91 (0.74, 1.12)        | 0.89 (0.73, 1.10)        | 0.85 (0.69, 1.05)        |
|                                 | 6–11                            | 257          | Ref.                     | Ref.                     | Ref.                     |
|                                 | ≥12                             | 266          | <b>1.45 (1.20, 1.74)</b> | <b>1.42 (1.18, 1.71)</b> | <b>1.46 (1.20, 1.76)</b> |

<sup>a</sup> Obesity phenotype I includes Metabolic Healthy Normal Weight (MHNW, Reference group), Metabolic Unhealthy Normal Weight (MUNW), Metabolic Healthy Obesity (MHO) and Metabolic Unhealthy Obesity (MUO).

<sup>b</sup> Model 1: crude model.

<sup>c</sup> Model 2 adjusted for age, sex and residence of children and adolescents.

<sup>d</sup> Model 3 adjusted for variables in Model 2 plus single-child status, delivery model, delivery date, birthweight, family history of diseases (obesity, hypertension, diabetes mellitus and cerebrovascular disease), parental education level, parental tobacco and alcohol consumption, maternal age at delivery, family household income. Bold OR (95% CI) indicated statistically significant ( $P < 0.05$ ).

**Table S2.** Risk of obesity phenotypes according to healthy lifestyle category and breastfeeding duration.

| Breastfeeding duration<br>(months) | Healthy lifestyle<br>category | MUNW                     |                | MHO                      |                | MUO                      |                |
|------------------------------------|-------------------------------|--------------------------|----------------|--------------------------|----------------|--------------------------|----------------|
|                                    |                               | Adjusted OR (95% CI)     | <i>P</i> value | Adjusted OR (95% CI)     | <i>P</i> value | Adjusted OR (95% CI)     | <i>P</i> value |
| 0–5                                | Favorable                     | 0.84 (0.60, 1.16)        | 0.288          | 1.07 (0.58, 1.95)        | 0.831          | 0.87 (0.51, 1.47)        | 0.598          |
|                                    | Intermediate                  | 0.79 (0.60, 1.04)        | 0.091          | 1.07 (0.64, 1.78)        | 0.795          | 0.83 (0.54, 1.28)        | 0.402          |
|                                    | Unfavorable                   | 0.97 (0.75, 1.25)        | 0.813          | 1.38 (0.86, 2.21)        | 0.188          | 1.08 (0.72, 1.62)        | 0.715          |
| 6–11                               | Favorable                     | Ref.                     |                | Ref.                     |                | Ref.                     |                |
|                                    | Intermediate                  | 0.92 (0.71, 1.19)        | 0.522          | 0.8 (0.48, 1.33)         | 0.388          | 1.24 (0.83, 1.84)        | 0.289          |
|                                    | Unfavorable                   | 1.10 (0.87, 1.40)        | 0.430          | 1.1 (0.68, 1.78)         | 0.690          | 1.04 (0.70, 1.54)        | 0.853          |
| ≥12                                | Favorable                     | 1.13 (0.82, 1.56)        | 0.457          | 1.3 (0.70, 2.40)         | 0.406          | 0.98 (0.57, 1.68)        | 0.946          |
|                                    | Intermediate                  | 1.29 (0.99, 1.67)        | 0.063          | 1.49 (0.89, 2.49)        | 0.132          | <b>1.76 (1.17, 2.65)</b> | 0.007          |
|                                    | Unfavorable                   | <b>1.51 (1.18, 1.93)</b> | 0.001          | <b>1.71 (1.06, 2.75)</b> | 0.028          | <b>1.70 (1.16, 2.52)</b> | 0.007          |

Note: Obesity phenotype I includes Metabolic Healthy Normal Weight (MHNW, Reference group), Metabolic Unhealthy Normal Weight (MUNW), Metabolic Healthy Obesity (MHO) and Metabolic Unhealthy Obesity (MUO). Adjusted for age, sex, residence, single-child status, delivery model, delivery date, birthweight family history of diseases (obesity, hypertension, diabetes mellitus and cerebrovascular disease), parental education level, parental tobacco and alcohol consumption, maternal age at delivery, family household income.
